# Supplementary material
Source: publisher figshare collection journal article supplement (https://sage.figshare.com/ndownloader/files/21622542)
Supplement: Supplementary file 1 [file 21622542]

# Web Appendix: Composite Survey (Truncated)

**Census Tract:** _____________

**Address**

[Trait Hope] **Please read each item carefully. Using the scale shown below, please select the number that best describes YOU and put that number in the blank provided.**

| Definitely False | Mostly False | Somewhat False | Slightly False | Slightly True | Somewhat True | Mostly True | Definitely True |
| --- | --- | --- | --- | --- | --- | --- | --- |
| 1 | 2 | 3 | 4 | 5 | 6 | 7 | 8 |

I can think of many ways to get out of a jam.

I energetically pursue my goals.

I feel tired most of the time.

There are lots of ways around any problem.

I am easily downed in an argument.

I can think of many ways to get the things in life that are important to me.

I worry about my health.

Even when others get discouraged, I know I can find a way to solve the problem.

My past experiences have prepared me well for my future.

I've been pretty successful in life.

I usually find myself worrying about something.

I meet the goals that I set for myself.

[Perceived Access to Fresh Food] **Please rate your level of agreement with each of the following statements, where 1 = Strongly Disagree, and 7 = Strongly Agree.**

I have access to a variety of foods.

I have access to fresh food.

I have access to a variety of fruits and vegetables.

The fruits and vegetables I can access are fresh.

[Food Security] **I’m going to read you several statements that people have made about their food situation. For these statements, please tell me whether the statement was often true, sometimes true, or never true for (you/your household) in the last 12 months—that is, since last (name of current month).**

**HH3. “The food that (I/we) bought just didn’t last, and (I/we) didn’t have money to get more.” Was that often, sometimes, or never true for (you/your household) in the last 12 months?**

[ ] Often true [ ] Sometimes true [ ] Never true [ ] Don’t know or Refused

**HH4. “(I/we) couldn’t afford to eat balanced meals.” Was that often, sometimes, or never true for (you/your household) in the last 12 months?**

[ ] Often true [ ] Sometimes true [ ] Never true [ ] Don’t know or Refused

**AD1. In the last 12 months, since last (name of current month), did (you/you or other adults in your household) ever cut the size of your meals or skip meals because there wasn't enough money for food?**

[ ] Yes [ ] No (Skip AD1a) [ ] Don’t know or Refused (Skip AD1a)

**AD1a. [IF YES ABOVE, ASK] How often did this happen—almost every month, some months but not every month, or in only 1 or 2 months?**

[ ] Almost every month [ ] Some months but not every month [ ] Only 1 or 2 months [ ] Don’t know or Refused

**AD2. In the last 12 months, did you ever eat less than you felt you should because there wasn't enough money for food?**

[ ] Yes [ ] No [ ] Don’t know or Refused

**AD3. In the last 12 months, were you every hungry but didn't eat because there wasn't enough money for food?**

[ ] Yes [ ] No [ ] Don’t know or Refused

[From a list] **When taking public transportation, what is the purpose of your trips? (Select ALL that apply)** Grocery shopping

[Financial capability]

**FCS1. Do you currently have a personal budget, spending plan, or financial plan?**

[ ] Yes [ ] No

**FCS2. How confident are you in your ability to achieve a financial goal you set for yourself today?**

[ ] Not at all confident [ ] Somewhat confident [ ] Very confident

**FCS3. If you had an unexpected expense or someone in your family lost a job, got sick or had another emergency, how confident are you that your family could come up with money to make ends meet within a month?**

[ ] Not at all confident [ ] Somewhat confident [ ] Very confident

**FCS4. Do you currently have an automatic deposit or electronic transfer set up to put money away for a future use (such as savings)?**

[ ] Yes [ ] No

**FCS5. Over the past month, would you say your family’s spending on living expenses was less than its total income?**

[ ] Yes [ ] No

**FCS6. In the last 2 months, have you been charged a late fee on a loan or bill?**

[ ] Yes [ ] No

[Demographic] **The following questions are for statistical purposes to ensure that everyone in the community is represented by this survey.**

**In what year were you born?:**

**Do you currently rent or own your home?** Rent Own

**Including yourself, how many people currently live in your household?**

**How many children under the age of 18 currently live in your household?**

**Please select your gender:**

Male

Female

Non-Binary/Third Gender

**What is your marital status?**

Single, never married

Married or domestic partnership Separated

Divorced Widowed

**Please select your race and ethnicity. Select all that apply:**

White, Non-Hispanic

Hispanic or Latinx

Black or African American

Native American or American Indian

Asian / Southeast Asian / Pacific Islander

Other (SPECIFY)

**Please select the highest level of education you completed:**

Less than high school

High school graduate/GED

Some college

Associate’s Degree/Two Year Technical Degree

Four Year College Degree

Advanced Degree

**Employment status:**

Employed for wages

Self-employed

Out of work and looking for work

Out of work but not currently looking for work

A homemaker

A student

Military

Retired

Unable to work

**Please select the number that corresponds with your current household income from all sources, before taxes:**

<$5,000

$5,000 to under $7,999

$8,000 to under $10,999

$11,000 to under $13,999

$14,000 to under $16,999

$17,000 to under $19,000

$20,000 to under $24,999

$25,000 to under $29,999

$30,000 to under $34,999

$35,000 to under $39,999

$40,000 to under $44,999

$45,000 to under $49,999

$50,000 to under $54,999

$55,000 to under $59,999

$60,000 to under $64,999

$65,000 to under $69,999

$70,000 to under $84,999

$85,000 to under $99,999

$100,000 to under $125,000

$125,000 or greater

Don’t know

Refused to answer
